# Supplementary material for: Establishment of a Cell Suspension Culture of Ageratina Pichinchensis for the Improved Production of Anti-inflammatory Compounds
Source: Preprints.org preprint supplement (doi:10.20944/preprints202008.0443.v1), 2020-08-20
Supplement: Supplementary file 3 [file supplementary]

**Supplementary Materials:** The following are available online at www.mdpi.com/xxx/s1, Figure S1: 1H NMR (200 MHz, CDCl3:CD3OD) of compound (6), Figure S2: 13C NMR (50 MHz, CDCl3:CD3OD) of compound (6), Figure S3: 1H NMR (500 MHz, CDCl3:CD3OD) of compound (7), Figure S4: COSY (500 MHz, CDCl3:CD3OD) of compound (7), Figure S5: DEPT (125 MHz, CDCl3:CD3OD) of compound (7), Figure S6: 1H NMR (125 MHz, CDCl3:CD3OD) of compound (7), Figure S7: HSQC (500 MHz, CDCl3:CD3OD) of compound (7), Figure S8: HMBC (500 MHz, CDCl3:CD3OD) of compound (7), Figure S9: GC-MS chromatograms for standard compound and EtOAc extract. a) 2,3-dihydrobenzofuran profile used as a standard; b) EtOAc extract profile from *A. pichinchensis* cell culture suspension at 8 days of culture showing the peak of 2,3-dihydrobenzofuran compound, Figure S10: GC-MS chromatograms for standard compound and EtOAc extract. a) 3-epilupeol profile used as a standard; b) EtOAc extract profile from *A. pichinchensis* cell culture suspension at 16 days of culture showing the peak of 3-epilupeol compound.


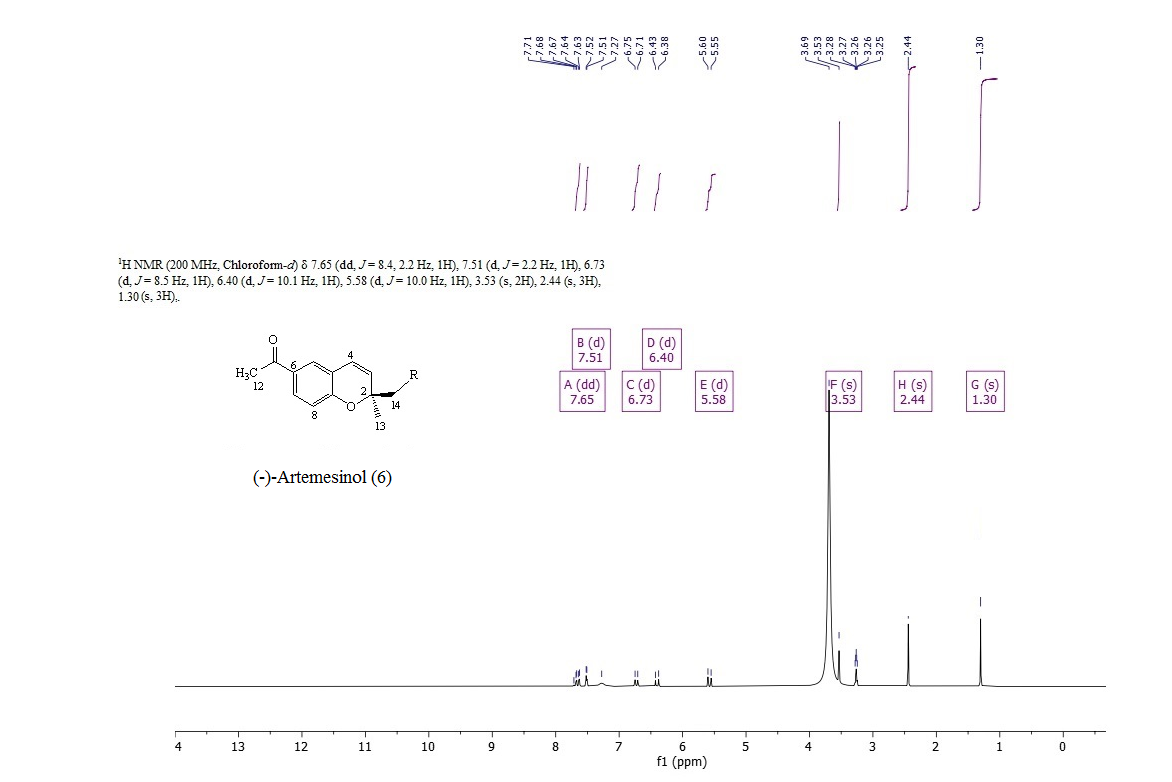


Figure S1: 1H NMR (200 MHz, CDCl3:CD3OD) of compound (6)


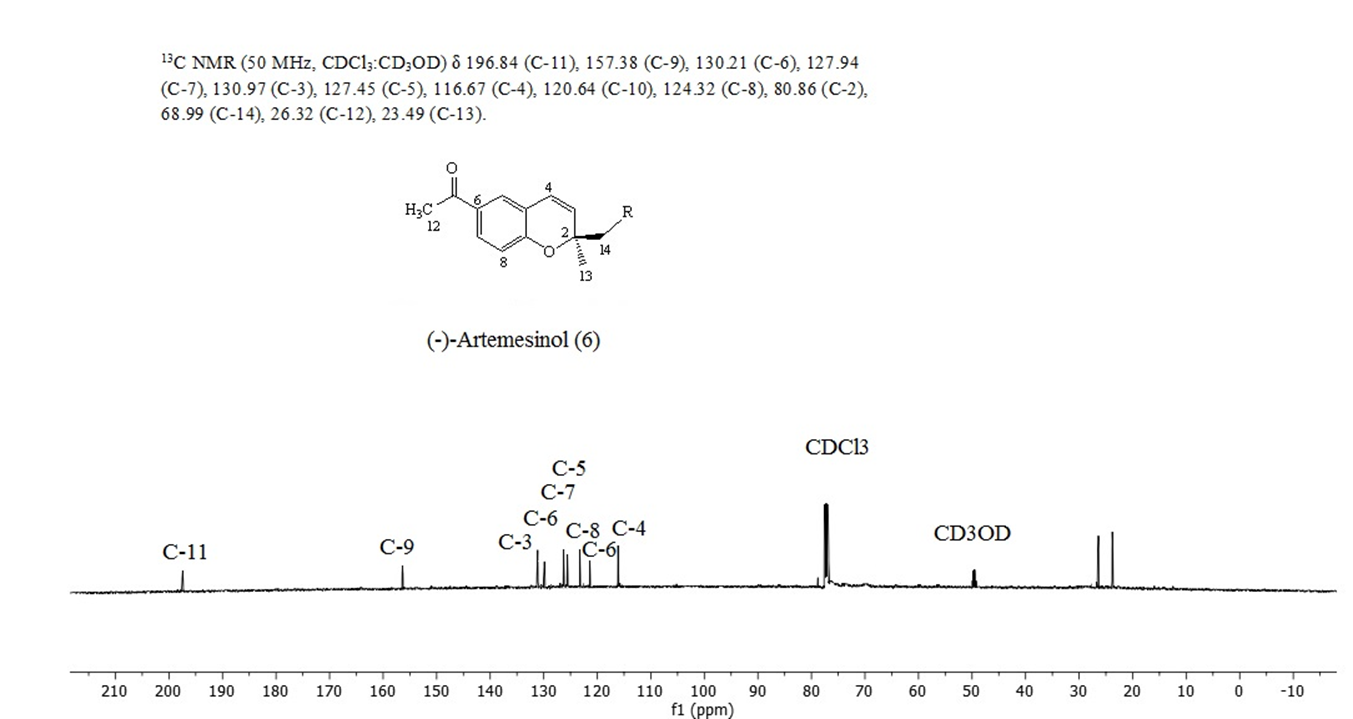


Figure S2: 13C NMR (50 MHz, CDCl3:CD3OD) of compound (6)


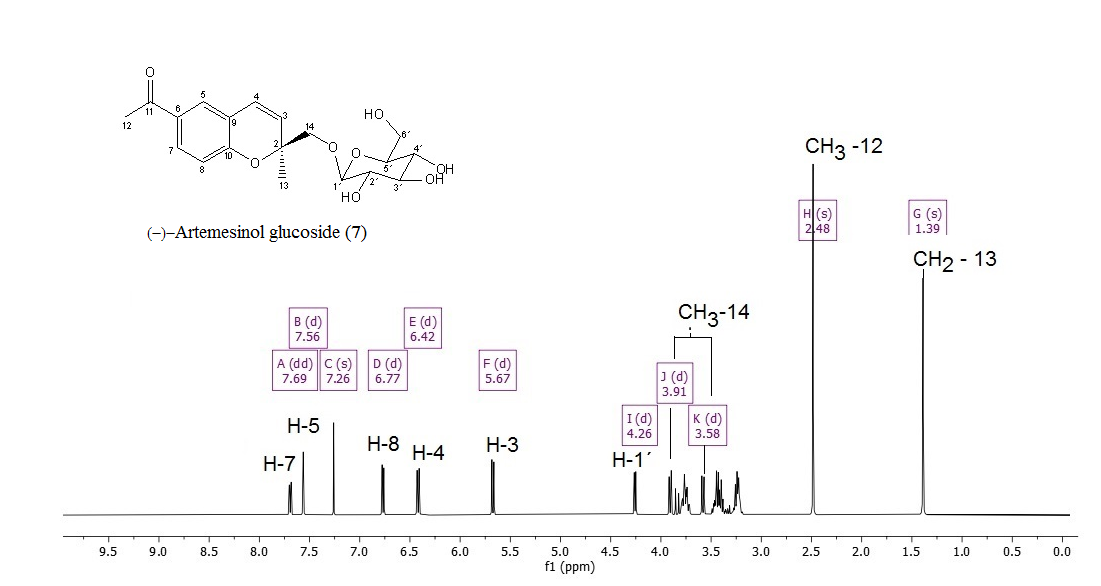


Figure S3: 1H NMR (500 MHz, CDCl3:CD3OD) of compound (7)


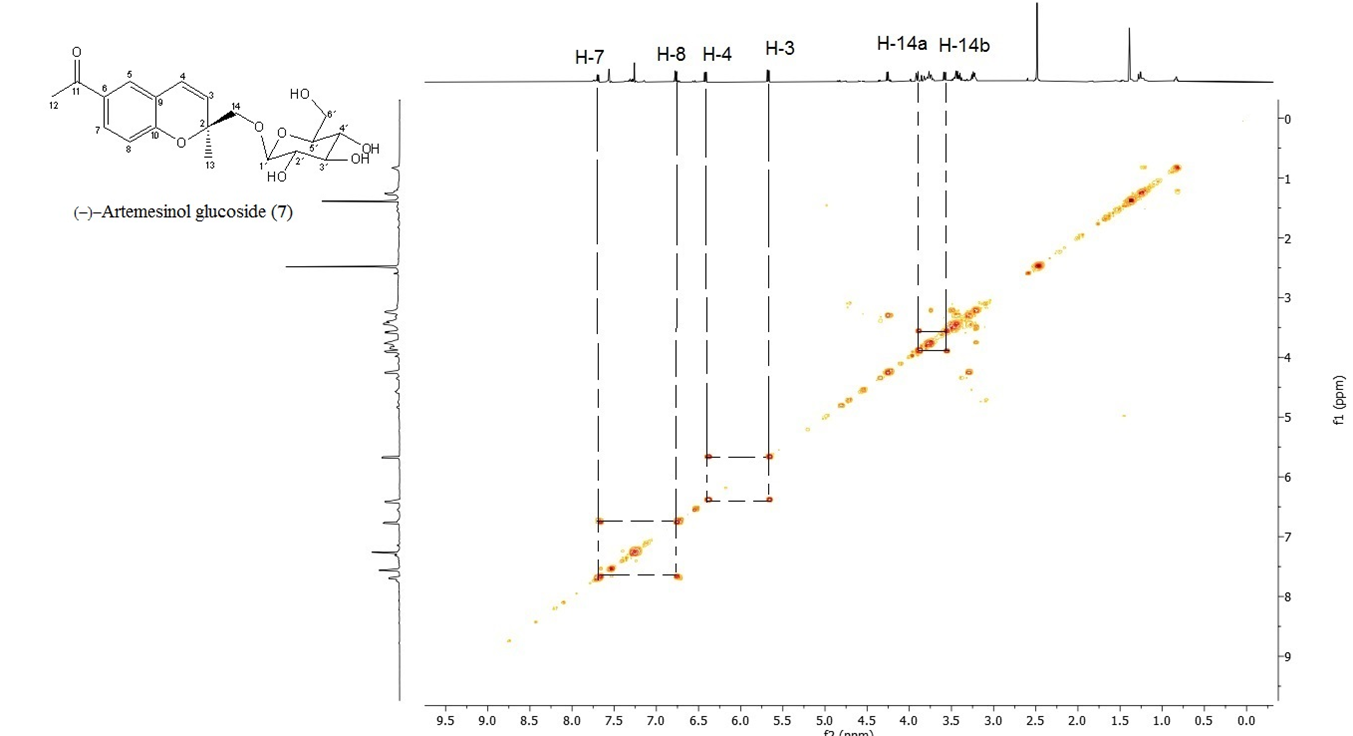


Figure S4: COSY (500 MHz, CDCl3:CD3OD) of compound (7)


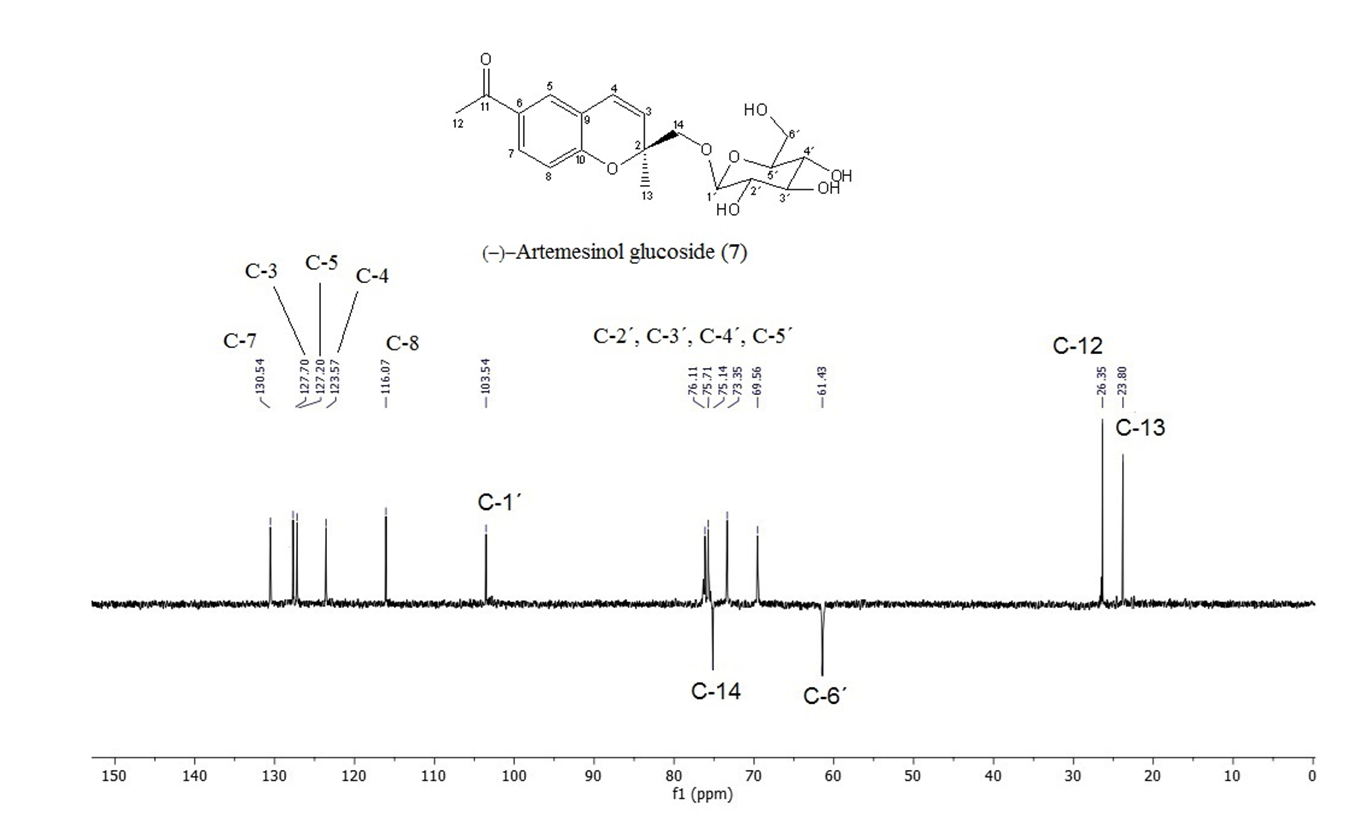


Figure S5: DEPT (125 MHz, CDCl3:CD3OD) of compound (7)


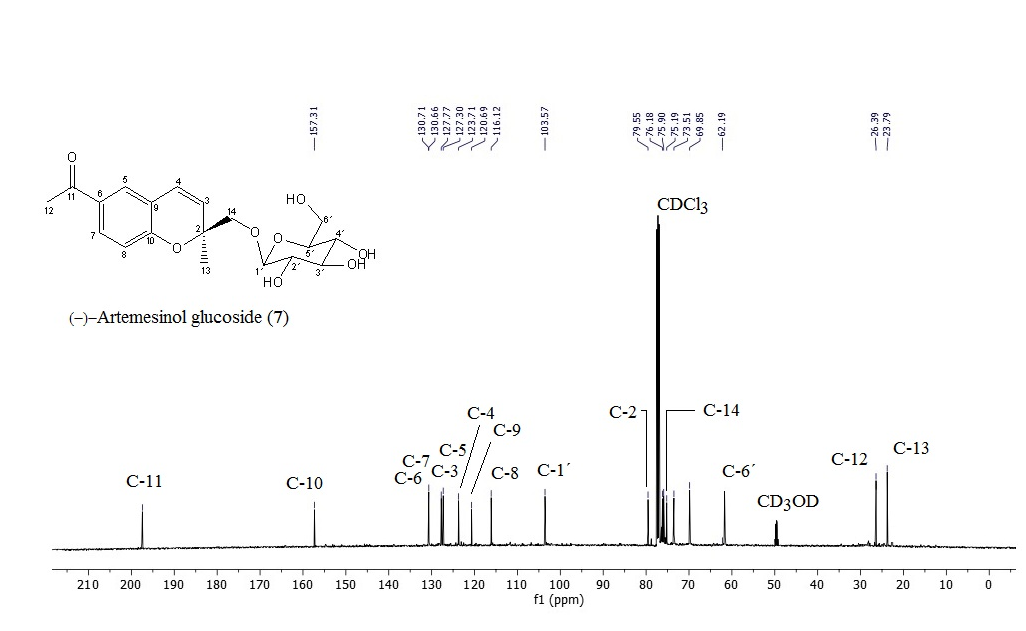


Figure S6: 1H NMR (125 MHz, CDCl3:CD3OD) of compound (7)


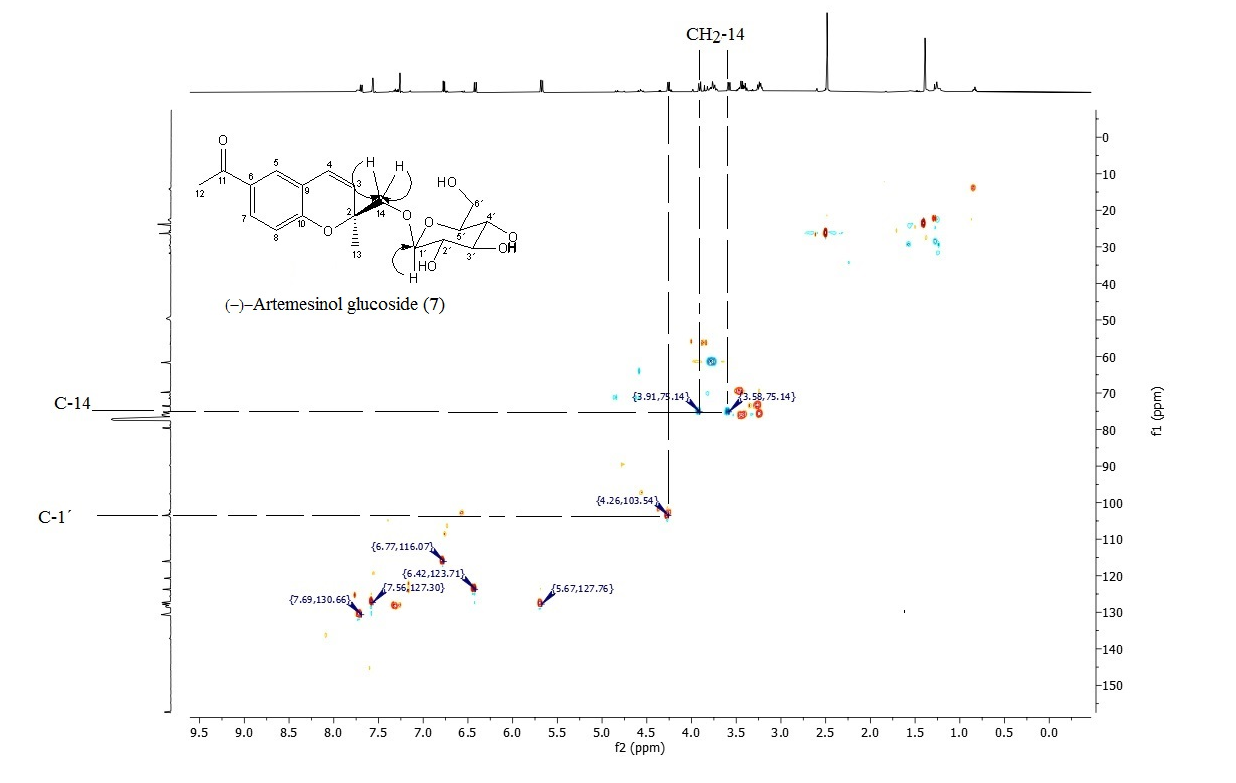


Figure S7: HSQC (500 MHz, CDCl3:CD3OD) of compound (7)


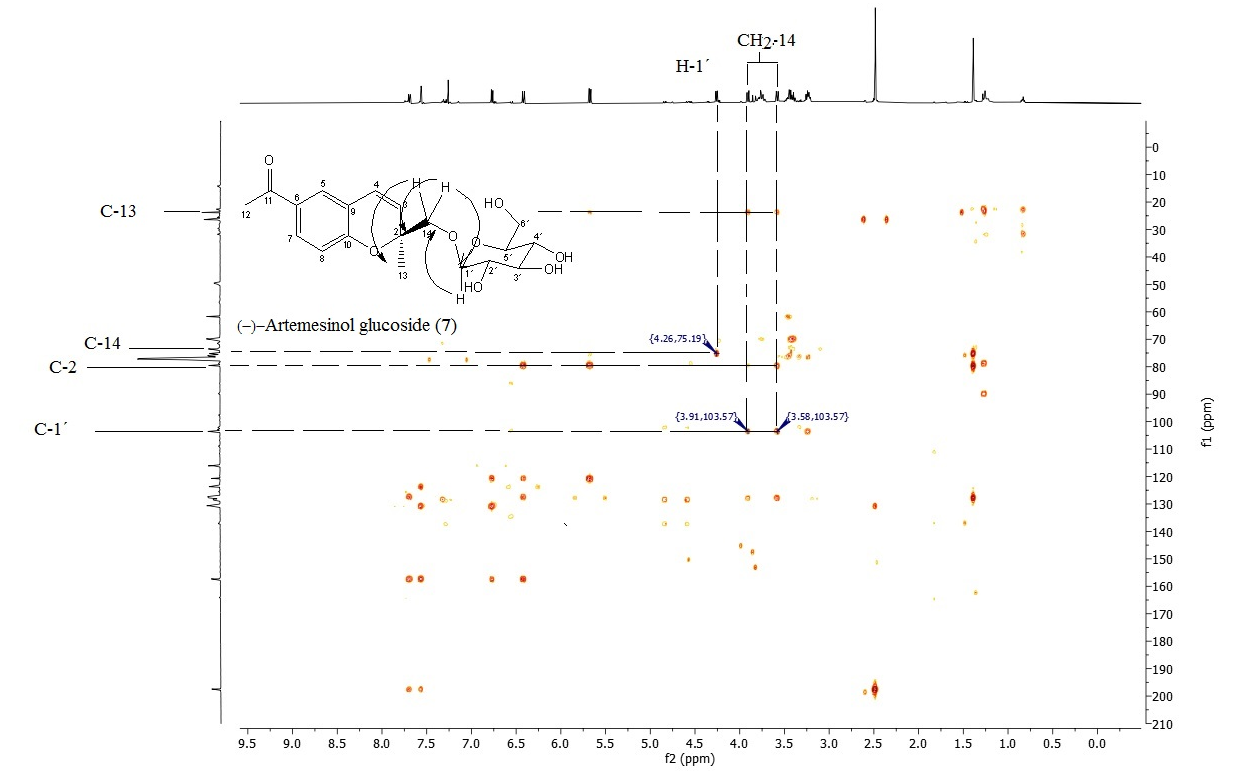


Figure S8: HMBC (500 MHz, CDCl3:CD3OD) of compound (7)

| 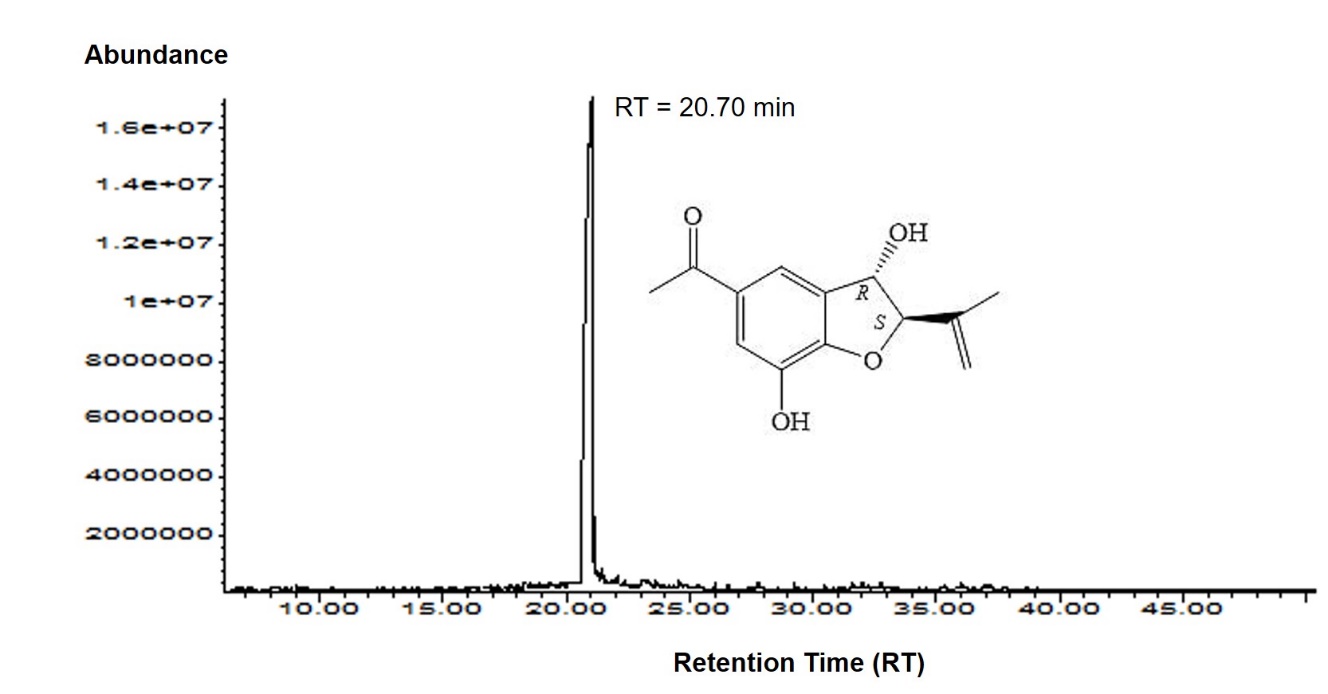 **a** 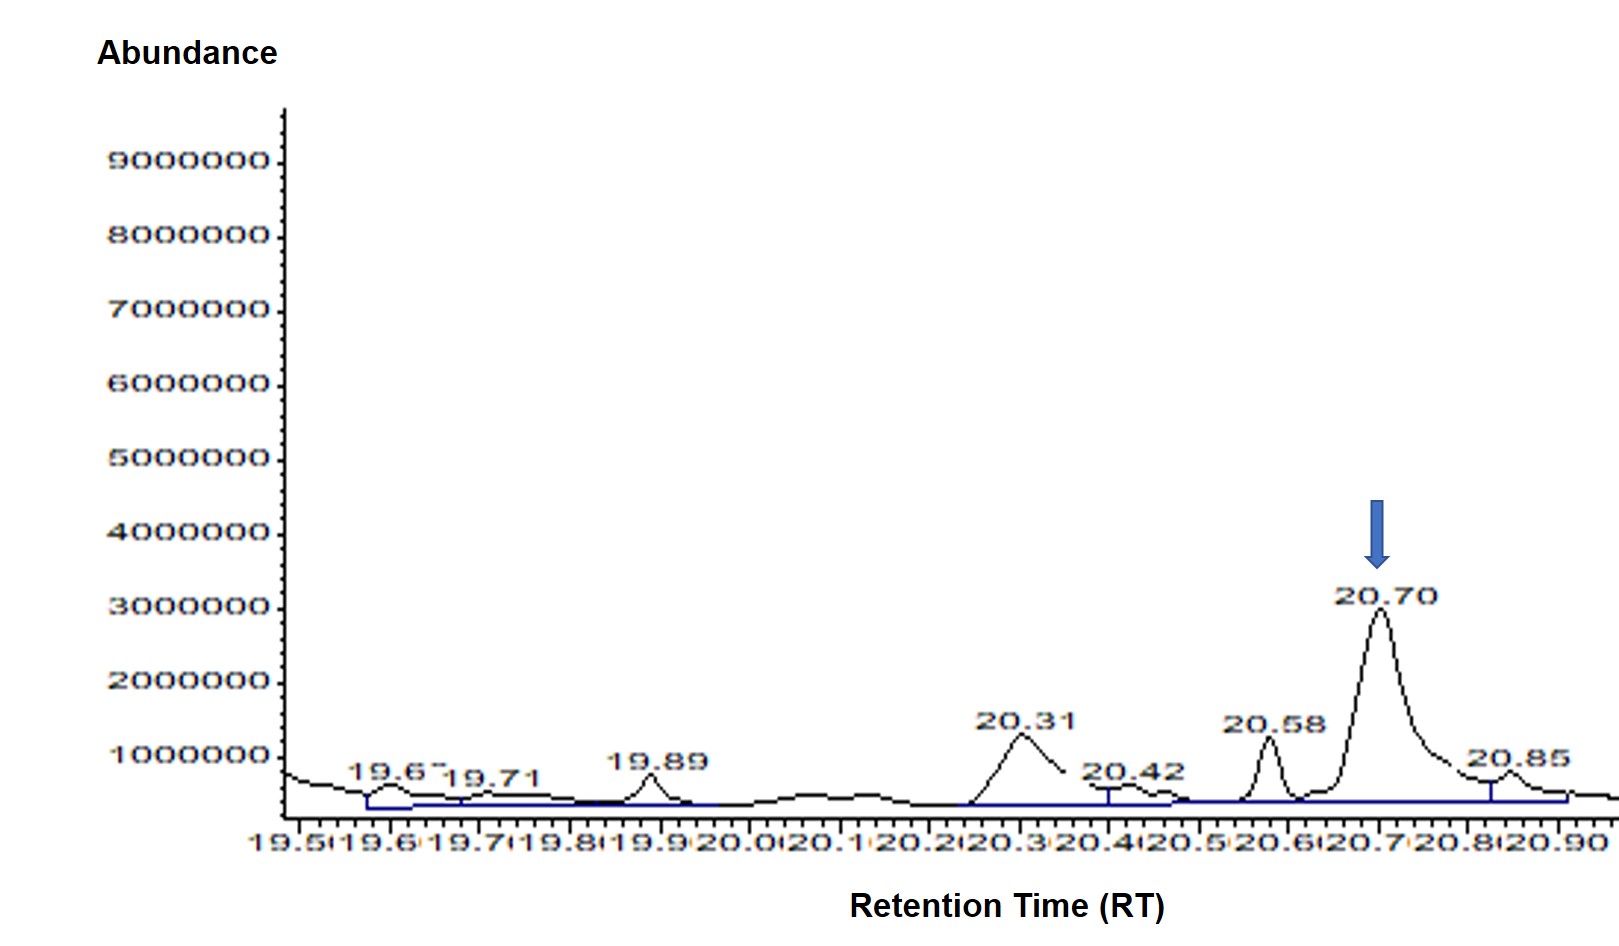 **b** |
| --- |
|  |

Figure S9: GC-MS chromatograms for standard compound and EtOAc extract. a) 2,3-dihydrobenzofuran profile used as a standard; b) EtOAc extract profile from *A. pichinchensis* cell culture suspension at 8 days of culture showing the peak of 2,3-dihydrobenzofuran compound.


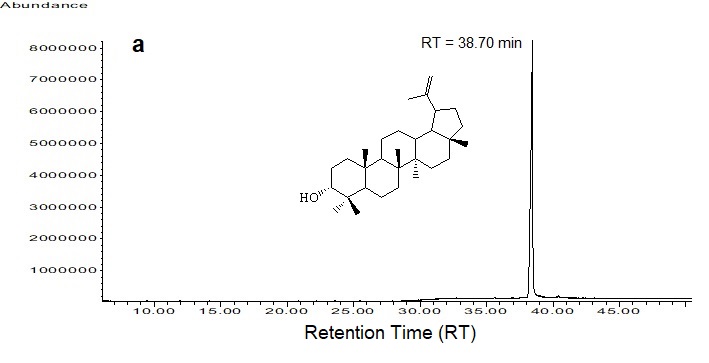


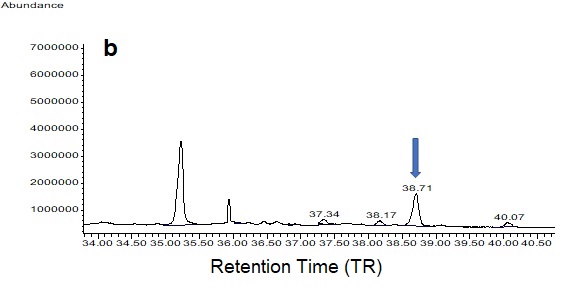
Figure S10: GC-MS chromatograms for standard compound and EtOAc extract. a) 3-epilupeol profile used as a standard; b) EtOAc extract profile from *A. pichinchensis* cell culture suspension at 16 days of culture showing the peak of 3-epilupeol compound.
